# Supplementary material
Source: Research Square preprint supplement (doi:10.21203/rs.3.rs-10080409/v1)
Supplement: Supplementary file 1 [file 6835fae84ec4bd307bf07135.docx]

**Supplementary Information**

**Distinct neuronal pathways to alcohol use disorder with and without comorbid social anxiety disorder**

Wüllhorst, Hildebrandt *et al.*

[**1.** **Supplementary Methods: Comparison to the preregistration** 2](#_Toc230081983)

[1.1 Relevant hypotheses for this study 2](#_Toc230081984)

[1.2 Sampling plan 3](#_Toc230081985)

[1.3 Sample size 4](#_Toc230081986)

[1.4 MRI acquisition 5](#_Toc230081987)

[1.5 Materials 6](#_Toc230081988)

[1.6 MRI Preprocessing 7](#_Toc230081989)

[1.7 Analyses 8](#_Toc230081990)

[1.8 ROI definition and analyses 8](#_Toc230081991)

[**2.** **Supplementary Results** 10](#_Toc230081992)

[2.1 Sample and data quality 10](#_Toc230081993)

[2.2 Group comparisons: Alcohol-related variables 12](#_Toc230081994)

[2.3 Group differences in inhibitory control 14](#_Toc230081995)

[2.4 Group-specific association of inhibitory control with AUD severity in AUD and COM 16](#_Toc230081996)

[2.5 Control analysis: Group-specific association of inhibitory control-related network activation with social anxiety severity 17](#_Toc230081997)

[2.6 Control analysis: The Association ofDMN activation and AUD severity in COM is not explained by social anxiety severity 17](#_Toc230081998)

[**3.** **Results with ROIs as preregistered** 18](#_Toc230081999)

[3.1 Group comparisons 18](#_Toc230082000)

[3.2 Group-specific associations between ROI activation and AUD severity in AUD and COM 21](#_Toc230082001)

[**References** 24](#_Toc230082002)

# **Supplementary Methods: Comparison to the preregistration**

To facilitate the comparison between preregistered and executed methods, below, we quote literally the relevant sections of the preregistration documents (<https://osf.io/e5ktf> and <https://osf.io/nq95s/files/uencm>) and outline all changes (if any) behind each paragraph. This study focuses on the association of AUD severity with neural correlates of inhibition and thus on the successful stop versus successful go contrast of the stop signal task and related preregistered analyses. Only parts of the preregistration referring to this research question are cited. Note that we termed AUD severity “alcohol-related problems [AUD severity]” in the preregistration.

## 1.1 Relevant hypotheses for this study

“The main research question of the project is to identify common and specific mechanisms in individuals with clinical expressions of social anxiety disorder (SAD), alcohol use disorder (AUD) and the combination of both disorders (COM). In the current study we focus on behavioral and neural correlates of inhibitory control.”

Ventral attention network

“We expect the neural activation in the right inferior frontal gyrus (rIFG), dorsal anterior cingulate cortex (dACC) and pre-supplementary motor areal (preSMA) during the stop signal task to be stronger during successful stop trials than during successful go trials.

We expect that individuals with AUD and COM will show impairments in inhibitory control (reduced activity in rIFG, dACC and preSMA, and longer SSRT) compared to individuals with SAD and HC [CP].

We expect that higher levels of alcohol-related problems [AUD severity] will correlate with more impaired inhibitory control (reduced activity in rIFG, dACC and preSMA and longer SSRT) […].

We expect that the interaction of social anxiety severity and alcohol-related problems [AUD severity] predicts impaired inhibitory control (reduced activity in rIFG, dACC and preSMA and longer SSRT), whereas social anxiety severity alone should not be associated with impaired inhibitory control.”

Default mode network

“[…] One key characteristic of SAD is altered processing of threat in social and/or performance situations. Clark and Wells (1) postulated that in these situations, individuals with SAD draw their attention towards themselves (e.g. physical stress symptoms, preparing what to say, focusing on errors (2)). As a result, it becomes more difficult to question assumptions about the environment, such as ‘no one is interested in me’, and accordingly to adequately react to external stimuli (e.g. incapacity to detect safety signals; Duval, Javanbakht (3)). Others argue that internal and external threat processing is impaired at the same time, eliciting anxiety symptoms. […] Furthermore, high levels of social anxiety were associated with increased activation in the default mode network and precuneus during the task, indicating high self-referential processes (4). (<https://osf.io/nq95s/files/uencm>)”

Coping motives

*“*In around 80% of the cases, SAD (mean age at illness onset is 15 years) precedes AUD with a mean age at illness onset of 26 years (5-8). This chronological order supports the self-medication hypothesis, i.e. that alcohol serves as a negative reinforcer in reducing unpleasant feelings such as social anxiety (9). The anxiolytic effect incentivizes future use in a similar situation (10, 11) and increases the risk to develop AUD in the long-term (12).

[…]”

***Changes referring to this section:***

Regarding the role of the DMN as described in the preregistration (see above), we expected altered activation in the DMN in SAD and COM compared to CP. Further, we explored whether altered DMN activation is associated with AUD or social anxiety severity in COM.

To enable more generalizable conclusions and to better parallel the hypotheses for the DMN, we also opted for a network perspective regarding the hypothesized reduced activation in inhibition-specific brain regions in AUD and COM and in association with AUD severity. Specifically, we used the ventral attention network rather than individual ROIs within this network (rIFG, dACC, and preSMA). Supplemental results based on the originally preregistered ROIs are reported in “4. Analyses with ROIs as preregistered” and support the same conclusions. As we expected no difference in VAN activation between SAD and CP, AUD and COM were only compared to CP to limit the number of comparisons.

To explore the rationale described in the preregistration (see above) concerning the etiological role of self-medication in the development of AUD given comorbid SAD, we examined coping motives, i.e. how often alcohol is consumed in order to cope with unpleasant feelings. We expected higher coping motives in the AUD and COM groups compared to CP, as well as higher coping motives for the COM group compared to AUD. Further, we explored whether drinking motives mediate the link of neural activation to AUD severity in COM.

## 1.2 Sampling plan

***Data collection procedures***

“Participants are recruited from the Dresden community and the TUD via newspaper advertisements, flyers, online recruitment, and from collaborating institutions such as the university hospital Carl Gustav Carus or the outpatient clinic for psychotherapy at the TUD.

Online pre-study: First, an online screening is conducted to assess self-rated social anxiety and alcohol use as well as demographic data, such as age. To recruit clinical groups, people with social anxiety scores > 60 (Liebowitz Social Anxiety Scale, LSAS; 13, 14) or/and problematic alcohol use scores ≥ 8 (Alcohol Use Identification Test, AUDIT; 15) are contacted first.

Telephone-screening: A telephone interview is conducted to ensure recruiting based on the in- and exclusion criteria described below.

Detailed In- and Exclusion Criteria: Inclusion criteria are age of 18 - 45 years, willingness to participate in all components of the study, informed consent and sufficient understanding of German language (mother tongue or learned before the age of 10 years). Exclusion criteria are (1) history of neurological disorder, mental retardation, or severe head trauma with unconsciousness, (2) history of current or previous specific mental disorders: schizophrenia, psychotic episode, manic episode, borderline personality disorder, (3) current eating disorder, severe major depressive episode or suicidality, (4) positive breath testing (> 0.00) or signs of acute intoxication with psychoactive substances or report of physical withdrawal symptoms, that could hinder task performance at one of the examination appointments, (5) physical disorders that could hinder or impair task performance (e.g. blindness, impaired hearing, restrictions in the ability to move fingers, claustrophobia), (6) less than four weeks since last use of cannabis, benzodiazepine, or other drugs, (7) pregnancy or nursing infants, (8) left-handedness, and (9) or any implants contraindicated in MRI (e.g. tattoos on the head, metal implants inside the body).

Additional inclusion and exclusion criteria for those with a diagnosis of either an AUD or SAD:

Individuals with AUD or SAD + AUD are only included in this study if they do not report to be abstinent, so that current users can be analyzed. In addition, they are also allowed to fulfill criteria for the pathological gambling disorder, intermittent explosive disorder, attention deficit hyperactivity disorder (ADHD), or other current substance use disorders If the latter is the case, abstinence rates described under inclusion criteria (6) are not realistic to achieve. We therefore follow a two-stage process. Firstly, we asked them on the telephone to abstain from psychoactive substances for four weeks prior to the sessions. If this is not possible, due to the disorder, they will be asked to abstain from consuming psychoactive substances (except nicotine) for at least the five-fold of the respective plasma half-life prior to testing (16) to ensure very low levels of active substances in the blood and render acute effects on the central nervous system unlikely. The time since the most recent use of every substance used by an individual is additionally assessed during the initial suitability check of both assessments. A table summarizing the required abstinence times for the most frequently used substances is handed out after the telephone screening (for an overview see Table 1).

**Table 1**

*Required abstinence times for exemplary substances*

| **Substance** | **Abstinence prior to laboratory session (hours)** |
| --- | --- |
| Laughing gas | No use on the day of the appointment |
| GHB / liquid Ecstasy | No use on the day of the appointment |
| Cocaine | No use on the day of the appointment |
| Mephedrone | 10 |
| LSD | 12,5 |
| Ketamine | 12,5 |
| 2C-B | 12,5 |
| Heroine | 12,5 |
| Psilocybin | 15 |
| Codeine | 15 |
| Opium/Morphium | 15 |
| Tilidine | 17,5 |
| Amphetamine | 20 |
| Fentanyl | 20 |
| Alcohol | 24 |
| MDMA | 35 |
| Tramadol | 35 |
| Methamphetamine | 45 |
| Alprazolam/Xanax | 60 |
| Lorazepam | 70 |
| Methadone | 100 |
| Kratom | 121 |
| Cannabis | 140 |
| Diazepam/Valium | 250 |

A further exclusion criterium for participants with AUD is the presence of any anxiety disorder. In contrast, participants with SAD are not included in the study, if they fulfill criteria of any impulsive related disorder, such as another current substance use disorder or lifetime AUD, pathological gambling disorder, ADHD, intermittent explosive disorder.

All subjects receive at least 60 Euro for participation, in addition to a bonus in two of the tasks, resulting in approximately 75 Euro for the duration of two sessions (each 3,5 hours) and a maximum of 80 Euro (<https://osf.io/nq95s/files/uencm>).”

“We invited participants for two laboratory sessions after completing an online screening and a telephone screening (to ensure inclusion and exclusion criteria). In both sessions, participants underwent various measurements. The first session consisted of a clinical interview, questionnaire survey, and the acquisition of the SST while EEG was recorded. Regularly, the fMRI measurement took place in the second session, in which participants performed the SST again in the scanner. Due to practicability reasons (e.g. limited access to the scanner), n = 32 participants underwent the fMRI part right after the clinical interview in the first session, resulting a switch of the EEG and fMRI measurements. Besides the SST, we collected data of other paradigms (not relevant for the current study) and ensured that the order of the tasks within EEG and MRI measurements was counterbalanced within the assigned group (<https://osf.io/e5ktf>).“

***Changes referring to this section:***

- none -

## 1.3 Sample size

“Our target sample size are individuals fulfilling DSM-5 criteria for SAD (*n* = 50), AUD (*n* = 50), comorbid SAD and AUD (*n* = 50), as well as HC [CP] (*n* = 50), resulting in a total sample size of *N* = 200. However, this might entail testing 220 participants, anticipating non-finishers, technical issues during recording, or bad data quality.

Sample size estimation was conducted for both multiple regression analyses and analysis of variance with power (1 - β) = .80 and α = .05 using G*Power 3 (17). Assuming an effect size of *f*² = .15 for R² increase in multiple linear regression analyses of the separate neurocognitive and behavioral markers as outcome variables on the predictors social anxiety, problematic alcohol use and social anxiety x problematic alcohol use, a sample size of *N* = 77 would be required. As additional predictors, we will add age, gender and working memory capacity in the analyses. However, as we are interested in subgroup differences, group comparisons are also needed. Based on reported effect sizes of group comparisons of clinical samples with our markers as dependent variables (18-23) a sample size of *N* = 187 is needed to detect medium effect sizes *f* ≥ .29. To allow for potential dropout (acquisition error or data quality), we aim for a sample size of *N* = 200, with *n* = 50 in each group for analyses. However, we expect potential discontinuation after the first session, drop-outs due to positive breath test or incidental findings in the MRI session that will lead to exclude the participant from the overall analyses. Herewith, it might be necessary to recruit more than 200 participants. This could also entail a slightly larger group of HC [CP] compared to the clinical groups. To remain approximately on schedule, a total of *N* = 220 participants is the maximum that could be recruited (<https://osf.io/nq95s/files/uencm>).””

***Changes referring to this section:***

- none -

## 1.4 MRI acquisition

“MRI data was recorded at the Neuroimaging Center, TUD. In the middle of data collection (February 2022), the scanner was upgraded. With that, MRI data acquisition and two steps during preprocessing differed slightly and are reported in detail below, with a distinction made between ‘pre’ or ‘post’ scanner upgrade. We tried to collect an equal amount of data pre and post scanner upgrade, resulting in *n* = 99 pre upgrade MRI scans, and *n* = 97 post upgrade scans. To deal with possible differences between the analysis pipelines pre and post scanner upgrade, we will add scan version as a covariate in the analysis.

**Table 2**

*Details of fMRI data acquisition parameters*

| MRI system | Pre: SIEMENS MAGNETOM 3.0T, TrioTim syngo MR B17  Post: SIEMENS MAGNETOM, 3.0T, XR Numaris/X VA30A-03DZ |
| --- | --- |
| Pulse sequence | Gradient echo |
| Image type | Structural scan: 3D-MPRAGE  Functional scans: EPI |
| *Essential sequence & imaging parameters* | |
| T1-weighted anatomical images | TR 2000 ms  TE 2.01 ms (pre), 1.97 ms (post)  Flip angle 8°  Acquisition time 4:54 min  Field of View 256 mm  Field of View Phase 100.0%  Voxel size 1.0 mm³  Number of Slices 208  Slice Orientation sagittal, ascending  Post: ac-pc angulation  Pre echo spacing: 6.1 ms  Post echo spacing: 5.94 ms |
| Functional MRI stop signal task (fMRI_SST) | TR 869 ms  TE 38 ms  Flip angle 58°  Acquisition time 9:25 min  Field of View 210 mm  Field of View Phase 100.0%  Voxel size 2.4 mm³  Number of Slices 60  Slice Orientation: transversal T > C-19.7 > S0.2; interleaved, ascending  Post: different slice order requires import of DICOM header to correct slice timing  Phase orientation A >> P  Blip direction: -1 |
| Parallel imaging method & parameters | Yes, multi-band accel. factor 6 |
| Multiband parameters | Yes |
| Brain coverage | Whole-brain if it fits into field of view, else focus on full coverage of frontal and temporal areas |
| Field maps  Subsequent to the functional scan, a field map will be recorded to control later on for spatial distortions. | Essential parameters of the fieldmap for further fMRI_SST analyses are: TR = 698 ms, TE1 = 5.19 ms, TE2 = 7.65 ms; number of slices = 64, voxel size = 2.4 mm³ |
| Fat suppression | Not used for the anatomical scan. For fMRI_SST fat saturated. |

(<https://osf.io/nq95s/files/uencm>).“

***Changes referring to this section:***

Due to difficulties in recruiting severely affected AUD participants, more than half of these individuals were recruited after the scanner upgrade resulting in a confound of scanversion with our primary dependent variable AUD severity. To use scanversion as a covariate in our models would hence capture true variance in AUD severity that cannot be explained by the regressors of interest, potentially increasing type-2 error rate. To address this, we regressed scanversion on AUD severity and used the residuals of this model as a covariate in all analyses involving AUD severity or group comparisons, as groups differ in AUD severity. This variable represents the variance in scanversion that is not confounded with AUD severity (due to sequence of recruitment).

## 1.5 Materials

*“Visual stop-signal task (SST).* We measure the capacity to cancel an already initiated action with a visual SST that consists of 25 practice trials and two blocks of 128 trials. Within the task, a white circle presented on a grey background is visible at all times. Each block includes 96 (75%) go trials, on which the circle remains empty for 300-500 ms until a white arrow pointing to the right or left appears in the center of the circle for 1000 ms. Participants are asked to respond as quickly and accurately as possible with their index fingers according to the direction of the arrow. After each block, they receive feedback according to their previous performance (e.g. try to respond faster). A subset of trials in each block (*n* = 32; 25%) are stop trials, on which the arrow turns red—indicating that the already initiated response is to be stopped (the stop signal)—after a certain interval (stop signal delay, SSD). The SSD will be adapted trial wise in this task, to ensure that participants approach 50% successful inhibition rates by increasing or decreasing SSD by 50 ms after successful or failed inhibitions, respectively. To ensure that it is more difficult for participants to predict when a stop signal occurs within a trial, there are four different starting SSDs (100, 150, 200, and 250 ms), each active on 25% of stop trials and tracked by its own adaptation algorithm (24). Minimum and maximum SSDs are set to 50 and 350 ms, respectively. Go and stop trials are presented in pseudorandom order with the following constraints: The first three trials are go trials, left and right arrows occurred equally often within go and stop trials, stop trials and arrow direction will not be repeated more than twice. The inter-trial interval is a jitter between 288 - 2326 ms. Total task duration was 9 minutes.

We opt to analyze inhibition effects on alcohol-related problems [AUD severity]. However, in the present sample, at least half of the participants (HC [CP] and SAD groups) do not report moderate or severe problems with alcohol use resulting in a right-skewed distribution. Therefore, we pre-register not only our planned operationalization for alcohol-related problems [AUD severity], but also an alternative measurement.

*Alcohol-related problems [AUD severity]*

We assessed the AUD section of the Structured Clinical Interview for psychological disorders (SCID-5-CV; 25, 26), but added as per Hildebrandt, Schwarz (27) a severity measure according to each of the eleven criteria. Each of the eleven criteria could be assessed using a four-point Likert scale (ranging from: 0 (“not present”); 1 (“present, but not severe enough to meet the criterion”); 2 (“criterion is met”) and 3 “more pronounced”). We will use the sum of these individual severity score as measure of alcohol-related problems [AUD severity].”

*Alcohol Use*

Based on the Timeline follow-back Interview (28) “degree of alcohol use” will be operationalized by the sum of drinks in the last month. This sum score equates the combined sums of drinks (frequency X mean quantity) of weekdays (Monday-Thursday) and weekend days (Friday- Sunday). Participants were instructed to indicate how much alcohol they drank on each day of the last four weeks by translating the type and amount of alcohol in “standard drinks” (taking alcohol content into account), based on the Munich Composite International Diagnostic Interview (29). We will calculate the sum score separately for weekdays and weekend days, to later be able to control for possible differences in the drinking pattern.

*Severity of social anxiety symptoms*

We will use the sum score of the Liebowitz Social Anxiety Scale (LSAS; 13, 14) as a measure for the severity of social anxiety symptoms.

*SSRT*

SSRT will be calculated with the integration method with replacement of go omissions (as recommended by Verbruggen, Aron (30)).“

Drinking Motives Questionnaire Revised (31, 32) (<https://osf.io/nq95s/files/uencm>).”

***Changes referring to this section:***

- none -

## 1.6 MRI Preprocessing

*“Preliminary quality control*

There was no motion monitoring during data acquisition.

Data is checked for completeness and structural brain scans were inspected by neuroradiologists from the Universitätsklinikum Dresden (UKD) for incidental findings. One individual with an incidental finding (brain tumor) will be excluded from all analyses.

Images that have been acquired pre scanner upgrade are manually reoriented to the anterior commissure to reduce warping during coregistration and normalization. Post scanner upgrade, this step was not necessary anymore.

**Preprocessing**

Data preprocessing will be performed by MATLAB with the Statistical Parametric Mapping scripts package (SPM, Wellcome Trust Center for Neuroimaging) SPM12 preprocessing pipeline

1. Calculation of a voxel displacement map using the fieldmap toolbox

2. Slice timing correction (reference slice: middle slice) using SPM 12`s Fourier transform

3. Realignment of the functional images pre scanner upgrade to the single band reference image (sBRef) and post scanner upgrade to the mean image, respectively, (using a least squares approach and a six parameter (rigid body) spatial transformation; 4th degree B-Spline Interpolation), and unwarping of B0 distortions using the voxel displacement map

4. Coregistration of the structural image to the sBRef file for data acquired pre scanner upgrade, and to the mean unwarped functional image for data post scanner upgrade using normalized mutual information

5. Segmentation of the coregistered structural image

6. Normalization of the structural and the slice timing corrected functional images to the MNI152 standard brain (using 4th degree B-Spline Interpolation).

7. Smoothing of the normalized functional scans using a 8mm FHWM Gaussian Kernel to reduce noise “

“*Motion artefacts*

In order to deal with possible motion artefacts, we 1) split data in two separate runs, to ensure that block wise analyses are possible and to reduce noise resulting from motion artifacts during the short break between the runs, 2) as in Hildebrandt, Schwarz (27) we will exclude participants with a maximum framewise displacement of > 3.5 or more than 20 % of frames censored at a threshold of 0.5, and 3) include both a censoring regressor following the recommendations of Siegel, Power (33) in the first-level analysis that censored volumes surpassing a framewise displacement of 0.9, and motion parameters as regressors of no-interest.

*Success rate*

A block of the task will be considered valid, if the probability of successful stopping is between 30% and 70%. We will only include participants with at least one valid block of the task.“

***Changes referring to this section:***

As in Hildebrandt, Schwarz (27), a block was considered valid when the stopping probability was between 35 and 65%.

## 1.7 Analyses

**“First-Level Analyses**

We will compute a general linear model (GLM) that predicts fMRI activity while contrasting successful go (sGO) vs. successful stop (sStop) to determine activation during successful inhibition (inhibition contrast), and failed stop (fStop) vs. sGo to determine failed inhibition.

For the first-level GLM, we will enter the first-level regressors sGo, fGo, sStop, and fStop, convolved with a canonical hemodynamic response function, together with the six movement parameters derived from the realignment step and the motion censoring parameter as regressors of no interest.

At the model estimation stage, a high-pass filter with a cutoff of 128 seconds and an autoregressive model of the first order will be applied. We will create contrast images (sStop > sGo, and fStop > sGo) and subject them to second-level statistical analysis.

**Second-Level Analyses**

**Task activation**

To test whether activation in rIFG, dACC and preSMA [i.e. the VAN] is stronger during sStop trials than during sGo, we will calculate if the respective contrast (sGo vs. sStop) significantly differs between the conditions using a one sample t-test.

Exploratory, we will conduct whole brain analyses for the successful inhibition contrast using one sample t-tests to identify other regions activated in the SST. We expect inhibition related activity in brain networks relevant for inhibitory control (see for example 34, 35).

**Categorical between-subject analyses**

To investigate inhibitory control functioning between the four groups, we will conduct categorical analyses using the contrast images for successful inhibition activation within the three ROIs [updated to VAN and DMN] separately in a full-factorial design with group (SAD, AUD, COM, HC [CP]) as between-subject factor. As the MRI scanner was upgraded in the middle of data collection (see above) and the sex ratio differs between the groups, we will add scanner version (pre vs. post upgrade), and sex as covariates of no interest. *F*-tests will be followed up by post hoc *t*-tests to examine our hypotheses related to group differences. Significance will be assessed at the voxel-level, *p* < .05, familywise error (FWE) corrected within the ROIs. […]

As control analysis, we will examine whether the groups differ in motion parameters.

**Dimensional Analyses**

“We will compute multiple linear regression models of alcohol-related problems [AUD severity] on each inhibition marker: behavioral inhibitory capacity (SSRT, […]) and then, in separate models, neural activity […]. In these (multiple) linear regression models on [predicting] inhibitory control, we will enter in a step-wise fashion alcohol-related problems [AUD severity], and the interaction of social anxiety severity * alcohol-related problems [AUD severity]. In a separate model, we will test whether social anxiety severity predicts inhibitory control (null-effect assumed […]).”

***Changes referring to this section:***

Given the well-documented association of inhibitory control with age (36), this sociodemographic covariate was added to all analyses. As described in the preregistration, our aim was to investigate dimensional associations of inhibition markers and AUD severity across diagnostic categories. Further, we aimed to disentangle whether associations of inhibition with AUD severity were independent of, augmented by, or counteracted by associations of inhibition with social anxiety. As these research questions require group-wise testing, we added group as a moderator to the multiple regression models testing the association of inhibition markers and AUD severity (beyond the standard covariates sex, age and scanversion). Significant effects in the COM sample were followed up by regressing the respective inhibitory control marker on AUD severity and social anxiety severity (beyond the standard covariates sex, age and scanversion). As we expected a null effect for social anxiety severity (see above in preregistration), we added social anxiety severity as a regressor without testing for an interaction with AUD severity

## 1.8 ROI definition and analyses

“The selection of regions of interest (ROI) is based on Hildebrandt, Schwarz (27) findings and on results of a current meta-analysis (34). A large overlap of regions involved in inhibitory control was found in regions of the IFG, dACC as well as preSMA [i.e. the VAN]. Meta-analytical results have shown enhanced activation in the rIFG, dACC, and preSMA in control participants (34). Studies found hypoactivation in the dACC in actively drug addicted individuals (23, 37) and in the rIFG associated with substance-related problems (27) during response inhibition. In addition, the preSMA has also been shown to play an important role in inhibitory control in AUD (38), while being closely connected to prefrontal areas (39). Specifically, the stop process during the SST have been found to activate the preSMA after the IFG responds to a stop signal (40). Although other regions (e.g. Thalamus, Striatum) have been related to response inhibition in previous studies (34), in order to preserve statistical power, the present study selected the three most robustly identified regions that have been found to be altered in AUD. Furthermore, we expect the results in AUD to be similar to those from Hildebrandt, Schwarz (27), since we use the exact same task and scanner parameters. Therefore, we will extract the three ROIs (rIFG, dACC, preSMA) by transforming the activation pattern map of Hildebrandt, Schwarz (27) into a binary mask (thresholded at .01 for the IFG and at .03 for the ACC, and preSMA masks), with Autonomic Anatomical Labeling atlas (AAL; 41) using the WFU pickatlas SPM toolbox. Each of the three masks will be tested separately. To account for multiple comparisons on the voxel level, we will use small volume corrections (*p* < .05) within ROIs and Bonferroni-Holm correction for the number of ROIs.”

***Changes referring to this section:***

We used the recent 12-network MIST parcellation to define our network ROIs, the VAN and the DMN core (42). The three ROIs described above lie predominantly within the VAN. Small volume correction within the VAN rather than the three small individual ROIs allows for a network perspective while representing a more stringent multiple comparison correction across more voxels. Supplemental results based on the original ROIs are reported in chapter 3.

# **Supplementary Results**

## 2.1 Sample and data quality

**Detailed exclusion reasons for the final sample**

Unusable fMRI resulted from structural anomalies of the brain (n=1), MRI ineligibility (n=4), technical issues during MRI scanning (n=3), and excessive movement during fMRI (n=5).

**Table S1**

*Sample characteristics*

| **Variable** | **Full**  **sample** | **AUD** | **COM** | **SAD** | **CP** | **test** |  |
| --- | --- | --- | --- | --- | --- | --- | --- |
|  |  |  |  |  |  | ***F*/χ²** | ***p*** |
| **Demographic variables** | | | | | | | |
| N (% male) | 175 (50) | 43 (60) | 41 (56) | 49 (39) | 42 (48) | 5.05 | .168 |
| Age | 26.0 (5.9) | 27.4 (5.7) | 26.2 (6.8) | 25.4 (5.5) | 25.1 (5.4) | 1.39 | .249 |
| Education level (ISCED) |  |  |  |  |  | Fisher’s exact | .137 |
| *low* (0-2) | 5 (2.9) | 1 (2.4) | 1 (2.5) | 2 (4.2) | 1 (2.4) |  |  |
| *mediate* (3-4) | 116 (67.1) | 24 (69.0) | 33 (82.5) | 30 (62.5) | 29 (69.0) |  |  |
| *high* (5-8) | 52 (30.1) | 18 (28.6) | 6 (15.0) | 16 (33.3) | 12 (28.6) |  |  |
| Monthly Net Income |  |  |  |  |  | Fisher’s exact | .858 |
| *low* (< 1.250€) | 110 (63.6) | 25 (58.1) | 28 (70.0) | 30 (61.2) | 27 (65.9) |  |  |
| *medium* (1.250€ -3.000€) | 43 (24.9) | 13 (30.2) | 9 (22.5) | 13 (26.5) | 8 (19.5) |  |  |
| *high* (> 3.000€) | 20 (11.6) | 5 (11.6) | 3 (7.5) | 6 (12.2) | 6 (14.6) |  |  |
| **Stop Signal Data** |  |  |  |  |  |  |  |
| SSRT | 233.0 (29.8) | 238.8 (34.7) | 225.6 (27.6) | 232.0 (28.6) | 235.3 (27.4) | 1.74 | .161 |
| Mean SSD | 219.3 (34.0) | 222.1 (34.4) | 224.1 (34.3) | 221.7 (31.3) | 208.5 (36.2) | 1.93 | .126 |
| Mean RT sGo | 467.4 (43.5) | 468.8 (44.3) | 463.6 (45.6) | 464.8 (39.8) | 457.4 (37.9) | 0.54 | .655 |
| Intra-subject variability sGo RT | 82.1 (18.5) | 81.9 (20.3) | 85.0 (19.7) | 84.1 (18.2) | 77.0 (15.0) | 1.60 | .190 |
| Probability of go omissions | .005 (.020) | .008 (.037) | .005 (.008) | .003 (.009) | .003 (.008) | 0.16 | .689 |
| Probability of go errors | .012 (.016) | .011 (.016) | .011 (.021) | .008 (.008) | .017 (.018) | 2.07 | .106 |
| Mean RT failed stop | 420.4 (32.4) | 425.0 (33.2) | 418.4 (31.4) | 419.7 (31.5) | 418.3 (34.2) | 0.40 | .752 |
| P(error|Stop) | .50 (.06) | .49 (.06) | .51(.07) | .49 (.06) | .52 (.06) | 2.22 | .087 |

*Note:* Displayed are mean values (SD) unless otherwise stated (e.g. percentages for gender distribution), and statistical between-group and pairwise comparisons. CP, control participants; AUD, alcohol use disorder, SAD, social anxiety disorder; COM, comorbid group with AUD and SAD; Educational attainment was collapsed into three categories according to the ISCED 2011 classification, International Standard Classification of Education. SSRT, stop signal reaction time. SSD, stop signal delay. sGo, successful go trials. All stop signal task parameters extracted from valid blocks only. Groupwise comparisons based on ANOVA and Chi-Square models. Education level and monthly net income comparison was calculated using Fisher’s exact test due to small cell sizes.

**Table S2**

*DSM-5 Diagnoses and medication across the four groups*

| **Groups** | **AUD**  (n =43) | |  | **COM** (n=41) | |  | **SAD**  (n =49) | |  | **CP**  (n=42) | |
| --- | --- | --- | --- | --- | --- | --- | --- | --- | --- | --- | --- |
|  | *N* | *%* |  | *N* | *%* |  | *N* | *%* |  | *N* | *%* |
| **Internalizing Disorders** |  |  |  |  |  |  |  |  |  |  |  |
| *Depressive Disorders* |  |  |  |  |  |  |  |  |  |  |  |
| Major Depressive Disorder | 0 | 0 |  | 8 | 19.5 |  | 11 | 22.4 |  | 0 | 0 |
| Persistent Depressive Disorder (Dysthymia) | 0 | 0 |  | 7 | 17.1 |  | 2 | 4.1 |  | 0 | 0 |
| *Anxiety Disorders* |  |  |  |  |  |  |  |  |  |  |  |
| Social Anxiety Disorder | 0 | 0 |  | 41 | 100 |  | 49 | 100 |  | 0 | 0 |
| Separation Anxiety | 0 | 0 |  | 2 | 4.9 |  | 1 | 2.0 |  | 0 | 0 |
| Specific Phobia | 0 | 0 |  | 2 | 4.9 |  | 5 | 10.2 |  | 0 | 0 |
| Panic Disorder | 0 | 0 |  | 0 | 0 |  | 2 | 4.1 |  | 0 | 0 |
| Agoraphobic Disorder | 0 | 0 |  | 0 | 0 |  | 3 | 6.1 |  | 0 | 0 |
| Generalized Anxiety Disorder | 0 | 0 |  | 4 | 9.8 |  | 7 | 14.3 |  | 0 | 0 |
| *SAD and at least one other INT disorder* | 0 | 0 |  | 19 | 46.3 |  | 21 | 42.9 |  | 0 | 0 |
| **Externalizing Disorders** |  |  |  |  |  |  |  |  |  |  |  |
| *Substance-Related and Addictive Disorders* | | |  |  |  |  |  |  |  |  |  |
| Alcohol Use Disorder | 43 | 100 |  | 41 | 100 |  | 0 | 0 |  | 0 | 0 |
| Mild | 16 | 37 |  | 18 | 44 |  | 0 | 0 |  | 0 | 0 |
| Moderate | 14 | 33 |  | 16 | 39 |  | 0 | 0 |  | 0 | 0 |
| Severe | 13 | 30 |  | 7 | 17 |  | 0 | 0 |  | 0 | 0 |
| Cannabis Use Disorder | 2 | 4.7 |  | 8 | 19.5 |  | 0 | 0 |  | 0 | 0 |
| Cocaine Use Disorder | 1 | 2.3 |  | 0 | 0 |  | 0 | 0 |  | 0 | 0 |
| Amphetamine Use Disorder | 2 | 4.7 |  | 2 | 4.9 |  | 0 | 0 |  | 0 | 0 |
| Lorazepam Use Disorder | 0 | 0 |  | 1 | 2.4 |  | 0 | 0 |  | 0 | 0 |
| *Neurodevelopment Disorders* |  |  |  |  |  |  |  |  |  |  |  |
| Attention-Deficit/Hyperactivity Disorder | 1 | 2.3 |  | 4 | 9.8 |  | 0 | 0 |  | 0 | 0 |
| **Other** |  |  |  |  |  |  |  |  |  |  |  |
| Premenstrual Dysphoric Disorder | 2 | 4.7 |  | 3 | 7.3 |  | 7 | 14.3 |  | 0 | 0 |
| *Obsessive-Compulsive and Related Disorders* | | |  |  |  |  |  |  |  |  |  |
| Body Dysmorphic Disorder | 0 | 0 |  | 3 | 7.3 |  | 3 | 6.1 |  | 0 | 0 |
| Hoarding Disorder | 0 | 0 |  | 1 | 2.4 |  | 1 | 2.0 |  | 0 | 0 |
| Skin-Picking-Disorder | 2 | 4.7 |  | 4 | 9.8 |  | 2 | 4.1 |  | 0 | 0 |
| *Trauma- and Stressor-Related Disorders* | | |  |  |  |  |  |  |  |  |  |
| Posttraumatic Stress Disorder | 1 | 2.3 |  | 7 | 17.1 |  | 7 | 14.3 |  | 0 | 0 |
| *Somatic Symptom and Related Disorders* | | |  |  |  |  |  |  |  |  |  |
| Somatic Symptom Disorder | 1 | 2.1 |  | 1 | 2.4 |  | 2 | 4.1 |  | 0 | 0 |
| Illness Anxiety Disorder | 0 | 0 |  | 0 | 0 |  | 1 | 2.0 |  | 0 | 0 |
| *Eating Disorders* |  |  |  |  |  |  |  |  |  |  |  |
| Avoidant/Restrictive Food Intake Disorder | 0 | 0 |  | 0 | 0 |  | 1 | 2.0 |  | 0 | 0 |
| Binge Eating Disorder | 0 | 0 |  | 1 | 2.4 |  | 0 | 0 |  | 0 | 0 |
| *Sleep-Wake Disorders* |  |  |  |  |  |  |  |  |  |  |  |
| Insomnia Disorder | 1 | 2.3 |  | 12 | 29.3 |  | 4 | 8.2 |  | 0 | 0 |
| **Medication** |  |  |  |  |  |  |  |  |  |  |  |
| Antidepressants | 0 | 0 |  | 4 | 9.6 |  | 5 | 10.2 |  | 0 | 0 |
| SSRI | 0 | 0 |  | 3 | 7.3 |  | 5 | 10.2 |  | 0 | 0 |
| SSNRI | 0 | 0 |  | 1 | 2.4 |  | 0 | 0 |  | 0 | 0 |

*Note: N* = 175. Displayed are numbers and percentages of current DSM-5 diagnosis. AUD, alcohol use disorder, COM, comorbidity of alcohol use disorder and social anxiety disorder; SAD, social anxiety disorder; CP, control participants. INT, internalizing. SSRI, Selective Serotonin Reuptake Inhibitors; SSNRI, Selective Serotonin and Noradrenaline Reuptake Inhibitor.

## 2.2 Group comparisons: Alcohol-related variables

**Table S3**

*Fixed-Effects ANCOVA results using* ***mean drinks per drinking occasion*** *as the criterion*

| Predictor | Sum  of  Squares | *df* | Mean  Square | *F* | *p* | partial η2 | partial η2  90% CI  [LL, UL] |
| --- | --- | --- | --- | --- | --- | --- | --- |
| (Intercept) | 695.77 | 1 | 695.77 | 43.99 | .000 |  |  |
| femalesex | 195.66 | 1 | 195.66 | 12.37 | .001 | .07 | [.02, .14] |
| age | 49.81 | 1 | 49.81 | 3.15 | .078 | .02 | [.00, .06] |
| group | 495.79 | 3 | 165.26 | 10.45 | .000 | .16 | [.07, .23] |
| Error | 2672.87 | 169 | 15.82 |  |  |  |  |

*Note.* LL and UL represent the lower-limit and upper-limit of the partial η2 confidence interval, respectively.

**Table S4**

*Post hoc comparisons using* ***mean drinks per drinking occasion*** *as the criterion*

| Group (I) | Group (J) | *Mean difference (I-J)* | Std. Error | 95% CI  [LL, UL] | *t* | *p* |
| --- | --- | --- | --- | --- | --- | --- |
| AUD | COM | 0.15 | 0.87 | [-2.11, 2.40] | 0.17 | 1.00 |
|  | SAD | 3.60 | 0.85 | [1.41, 5.80] | 4.26 | 0.00 |
|  | CP | 3.37 | 0.87 | [1.11, 5.64] | 3.86 | 0.00 |
| COM | SAD | 3.46 | 0.85 | [1.26, 5.66] | 4.08 | 0.00 |
| COM | CP | 3.23 | 0.88 | [0.95, 5.50] | 3.68 | 0.00 |
| SAD | CP | -0.23 | 0.84 | [-2.41, 1.94] | -0.28 | 0.99 |

Mean difference: Difference in estimated marginal means controlled for sex. 95%-CI: 95% Confidence Interval for the Mean Difference.

**Table S5**

*Fixed-Effects ANCOVA results using* ***drinking occasions per month*** *as the criterion*

| Predictor | Sum  of  Squares | *df* | Mean  Square | *F* | *p* | partial η2 | partial η2  90% CI  [LL, UL] |
| --- | --- | --- | --- | --- | --- | --- | --- |
| (Intercept) | 1246.16 | 1 | 1246.16 | 36.36 | .000 |  |  |
| femalesex | 21.71 | 1 | 21.71 | 0.63 | .427 | .00 | [.00, .03] |
| age | 6.57 | 1 | 6.57 | 0.19 | .662 | .00 | [.00, .02] |
| group | 2817.92 | 3 | 939.31 | 27.41 | .000 | .33 | [.23, .40] |
| Error | 5792.02 | 169 | 34.27 |  |  |  |  |

*Note.* LL and UL represent the lower-limit and upper-limit of the partial η2 confidence interval, respectively.

**Table S6**

*Post hoc comparisons using* ***drinking occasions per month*** *as the criterion*

| Group (I) | Group (J) | *Mean difference (I-J)* | Std. Error | 95% CI  [LL, UL] | *t* | *p* |
| --- | --- | --- | --- | --- | --- | --- |
| AUD | COM | 2.43 | 1.28 | [-0.89, 5.76] | 1.90 | 0.23 |
|  | SAD | 9.14 | 1.24 | [5.91, 12.37] | 7.34 | 0.00 |
|  | CP | 9.28 | 1.29 | [5.94, 12.61] | 7.22 | 0.00 |
| COM | SAD | 6.70 | 1.25 | [3.46, 9.95] | 5.37 | 0.00 |
| COM | CP | 6.85 | 1.29 | [3.50, 10.19] | 5.31 | 0.00 |
| SAD | CP | 0.14 | 1.23 | [-3.06, 3.34] | 0.11 | 1.00 |

Mean difference: Difference in estimated marginal means controlled for sex. 95%-CI: 95% Confidence Interval for the Mean Difference.

**Table S7**

*Fixed-Effects ANCOVA results using the* ***SCID-5 AUD severity rating*** *as the criterion*

| Predictor | Sum  of  Squares | *df* | Mean  Square | *F* | *p* | partial η2 | partial η2  90% CI  [LL, UL] |
| --- | --- | --- | --- | --- | --- | --- | --- |
| (Intercept) | 9.21 | 1 | 9.21 | 31.54 | .000 |  |  |
| femalesex | 0.11 | 1 | 0.11 | 0.38 | .539 | .00 | [.00, .03] |
| age | 1.19 | 1 | 1.19 | 4.09 | .045 | .02 | [.00, .07] |
| group | 98.17 | 3 | 32.72 | 112.13 | .000 | .67 | [.59, .71] |
| Error | 49.32 | 169 | 0.29 |  |  |  |  |

*Note.* LL and UL represent the lower-limit and upper-limit of the partial η2 confidence interval, respectively. Due to non-normal distribution, the SCID-5 AUD severity ratingwas transformed using the ordered quantile transformation prior to inference testing.

**Table S8**

*Post hoc comparisons using the* ***SCID-5 AUD severity rating*** *as the criterion*

| Group (I) | Group (J) | *Mean difference (I-J)* | Std. Error | 95% CI  [LL, UL] | *t* | *p* |
| --- | --- | --- | --- | --- | --- | --- |
| AUD | COM | 0.04 | 0.12 | [-0.27, 0.35] | 0.35 | 0.99 |
|  | SAD | 1.51 | 0.11 | [1.22, 1.81] | 13.19 | 0.00 |
|  | CP | 1.58 | 0.12 | [1.27, 1.89] | 13.33 | 0.00 |
| COM | SAD | 1.47 | 0.12 | [1.17, 1.77] | 12.78 | 0.00 |
| COM | CP | 1.54 | 0.12 | [1.23, 1.85] | 12.94 | 0.00 |
| SAD | CP | 0.07 | 0.11 | [-0.23, 0.36] | 0.58 | 0.94 |

Mean difference: Difference in estimated marginal means controlled for sex. 95%-CI: 95% Confidence Interval for the Mean Difference. Due to non-normal distribution, the SCID-5 AUD severity ratingwas transformed using the ordered quantile transformation prior to inference testing.

**Coping Motives**

**Table S9**

*Fixed-Effects ANCOVA results using* ***coping motives*** *as the criterion*

| Predictor | Sum  of  Squares | *df* | Mean  Square | *F* | *p* | partial η2 | partial η2  90% CI  [LL, UL] |
| --- | --- | --- | --- | --- | --- | --- | --- |
| (Intercept) | 5.57 | 1 | 5.57 | 11.31 | .001 |  |  |
| femalesex | 0.38 | 1 | 0.38 | 0.76 | .384 | .00 | [.00, .04] |
| age | 0.20 | 1 | 0.20 | 0.41 | .525 | .00 | [.00, .03] |
| group | 63.87 | 3 | 21.29 | 43.19 | .000 | .43 | [.33, .50] |
| Error | 83.30 | 169 | 0.49 |  |  |  |  |

*Note.* LL and UL represent the lower-limit and upper-limit of the partial η2 confidence interval, respectively. Due to non-normal distribution, coping motives was transformed using the ordered quantile transformation prior to inference testing.

**Table S10**

*Post hoc hypothesis testing for group comparisons using* ***coping motives*** *as the criterion*

| Group (I) | Group (J) | *Mean difference (I-J)* | Std. Error | 95% CI  [LL, UL] | *t* | *pone-sided* |
| --- | --- | --- | --- | --- | --- | --- |
| CP | AUD | -0.87 | 0.15 | [-1.27, -0.47] | -5.65 | <.001 |
| CP | COM | -1.70 | 0.15 | [-2.10, -1.30] | -11.01 | <.001 |
| AUD | COM | -0.83 | 0.15 | [-1.23, -0.43] | -5.41 | <.001 |

Mean difference: Difference in estimated marginal means controlled for sex. 95%-CI: 95% Confidence Interval for the Mean Difference. Due to non-normal distribution, coping motives was transformed using the ordered quantile transformation prior to inference testing.

## 2.3 Group differences in inhibitory control

***2.3.1 Neuronal inhibitory control***

No significant peaks for the main effect of group and the preregistered post-hoc comparisons (AUD>CP, COM>CP) at p<.05 FWE-corrected for group comparisons in inhibition-related neural activation, neither within the default mode network nor the ventral attention network.

**Quality control procedures**

We quantified several head motion parameters and compared them between the four groups (see Table S14). These parameters included the mean voxel-based framewise displacement (FD) and the maximal volume-to-volume translational and rotational excursions across the time series.

**Table S11**

*Group differences in quality parameters of the final sample*

| **Group** | **AUD** | **COM** | **SAD** | **CP** | **Between-group differences** |
| --- | --- | --- | --- | --- | --- |
| N | 43 | 41 | 49 | 42 |  |
| Movement: Power’s FD | 0.20  (0.01) | 0.18  (0.01) | 0.20  (0.01) | 0.18  (0.01) | F(3,169) = 0.01, *p* = .944 |
| Movement: total translation (mm) | 0.80  (0.06) | 0.85  (0.06) | 0.79  (0.05) | 0.78  (0.05) | F(3,170) = 0.36, *p* = .563 |
| Movement: total rotation (degrees) | 0.60  (0.04) | 0.71  (0.08) | 0.68  (0.07) | 0.71  (0.07) | F(3,170) = 0.33, *p* = .566 |

*Note.* Displayed are mean values (standard error); CP: control participants; AUD: alcohol use disorder; SAD: social anxiety disorder; COM: comorbid alcohol use disorder and social anxiety disorder; FD: framewise displacement.

***2.3.2 Behavioral inhibitory control: SSRT***

**Table S12**

*Fixed-Effects ANCOVA results using the stop signal reaction time as the criterion*

| Predictor | Sum  of  Squares | *df* | Mean  Square | *F* | *p* | partial η2 | partial η2  90% CI  [LL, UL] |
| --- | --- | --- | --- | --- | --- | --- | --- |
| (Intercept) | 4.31 | 1 | 4.31 | 4.49 | .036 |  |  |
| femalesex | 1.53 | 1 | 1.53 | 1.59 | .209 | .01 | [.00, .05] |
| age | 5.60 | 1 | 5.60 | 5.83 | .017 | .03 | [.00, .09] |
| group | 4.76 | 3 | 1.59 | 1.65 | .179 | .03 | [.00, .07] |
| Error | 162.34 | 169 | 0.96 |  |  |  |  |

*Note.* LL and UL represent the lower-limit and upper-limit of the partial η2 confidence interval, respectively. Due to non-normal distribution, SSRT was transformed using the ordered quantile transformation prior to inference testing.

**Table S13**

*Post hoc hypothesis testing for preregistered comparisons using the SSRT as the criterion*

| Group (I) | Group (J) | *Mean difference (I-J)* | Std. Error | 95% CI  [LL, UL] | *t* | *pone-sided* |
| --- | --- | --- | --- | --- | --- | --- |
| CP | AUD | -0.08 | 0.22 | [-0.64, 0.48] | -0.38 | .354 |
|  | COM | 0.37 | 0.22 | [-0.19, 0.93] | 1.69 | .954 |

Mean difference: Difference in estimated marginal means controlled for sex. 95%-CI: 95% Confidence Interval for the Mean Difference. Due to non-normal distribution, SSRT was transformed using the ordered quantile transformation prior to inference testing.

**Figure S1**

*Group differences in estimated marginal means from ANCOVA using the stop signal reaction time as the criterion*


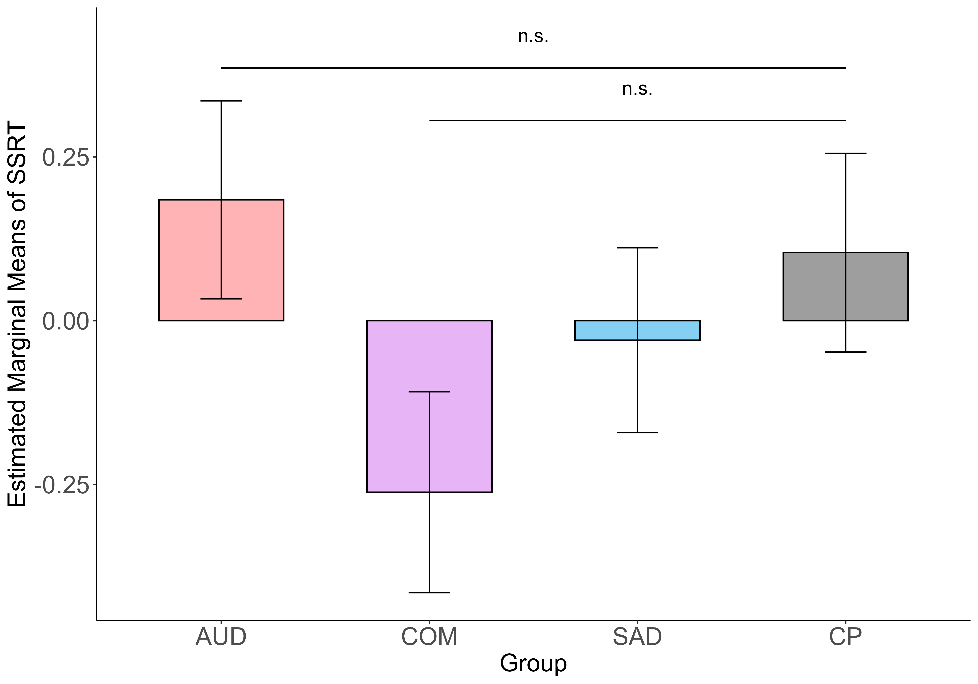


*Note.*SSRT was transformed using the ordered quantile transformation prior to inference testing.* significant mean difference in post-hoc test with directed hypothesis (AUD/COM longer SSRT than CP).

## 2.4 Group-specific association of inhibitory control with AUD severity in AUD and COM

***2.4.1 Group-specific* *association of neuronal activation with AUD severity***

**Table S14**

*Activation peaks from the contrasts reflecting AUD- and COM-specific AUD severity effects from the two full factorial models regressing inhibition-related neuronal activation on the interaction of group and AUD severity*

| **Small** | ***Group*** |  |  | MNI |  |  |  | | |  |
| --- | --- | --- | --- | --- | --- | --- | --- | --- | --- | --- |
| **volume** | *direction of effect* |  | coordinates | | |  |  | | |  |
|  | brain region | H | x | y | z |  | CS | T | pFWE |
| **VAN** | ***AUD*** |  |  |  |  |  |  |  |  |
|  | *less activation with more AUD severity* |  |  |  |  |  |  |  |  |
|  | pre-supplementary motor area | R | 15 | 8 | 65 |  | 34 | 4.34 | .036 |
|  |  |  |  |  |  |  |  |  |  |
|  | *more activation with more AUD severity* |  |  |  |  |  |  |  |  |
|  | no significant clusters |  |  |  |  |  |  |  |  |
|  |  |  |  |  |  |  |  |  |  |
|  | ***COM*** |  |  |  |  |  |  |  |  |
|  | *less activation with more AUD severity* |  |  |  |  |  |  |  |  |
|  | no significant clusters |  |  |  |  |  |  |  |  |
|  |  |  |  |  |  |  |  |  |  |
|  | *less activation with more AUD severity* |  |  |  |  |  |  |  |  |
|  | no significant clusters |  |  |  |  |  |  |  |  |
|  |  |  |  |  |  |  |  |  |  |
| **DMN** | ***AUD*** |  |  |  |  |  |  |  |  |
|  | *less activation with more AUD severity* |  |  |  |  |  |  |  |  |
|  | no significant clusters |  |  |  |  |  |  |  |  |
|  |  |  |  |  |  |  |  |  |  |
|  | *more activation with more AUD severity* |  |  |  |  |  |  |  |  |
|  | no significant clusters |  |  |  |  |  |  |  |  |
|  |  |  |  |  |  |  |  |  |  |
|  | ***COM*** |  |  |  |  |  |  |  |  |
|  | *less activation with more AUD severity* |  |  |  |  |  |  |  |  |
|  | superior frontal gyrus (mPFC) | L | -15 | 50 | 41 |  | 64 | 4.28 | .021 |
|  | superior frontal gyrus (mPFC) | L | -21 | 56 | 32 |  |  | 3.85 | .086 |
|  | superior frontal gyrus (mPFC) | L | -12 | 44 | 50 |  |  | 3.77 | .108 |
|  | superior frontal gyrus (mPFC) | L | -6 | 38 | 56 |  |  | 3.24 | .401 |
|  |  |  |  |  |  |  |  |  |  |
|  | *more activation with more AUD severity* |  |  |  |  |  |  |  |  |
|  | no significant clusters |  |  |  |  |  |  |  |  |
|  |  |  |  |  |  |  |  |  |  |

*Note*. MNI = Montreal Neurological Institute standard brain, H = hemisphere, Cs = cluster size in number of voxels. Link to AUD severity = effect of AUD severity on the inhibition contrast (sStop>sGo) controlled for scanversion, age and sex. Reported peaks are labelled according to the closest anatomical region based on AAL. Superior medial prefrontal cortex, mPFC. N = 175, degrees of freedom model: 164.

***2.4.2 Group-specific* *association of behavioral inhibitory control with AUD severity***

**SSRT**

**Table S15**

*Regression results using* **AUD severity** *as the criterion*

| Term | β | *SE* | *t* | *p* | 95% CI | Modelfit |
| --- | --- | --- | --- | --- | --- | --- |
| (Intercept) | .91 | .10 | 9.19 | < .001*** | [0.71, 1.10] |  |
| SSRT | .05 | .09 | 0.56 | .575 | [-0.12, 0.22] |  |
| groupCP | -1.7 | .13 | -13.20 | < .001*** | [-1.95, -1.44] |  |
| groupSAD | -1.62 | .12 | -12.97 | < .001*** | [-1.86, -1.37] |  |
| groupCOM | -.03 | .13 | -0.22 | .825 | [-0.29, 0.23] |  |
| femalesex | -.08 | .09 | -0.87 | .387 | [-0.26, 0.10] |  |
| age | -.11 | .05 | -2.26 | .025* | [-0.20, -0.01] |  |
| SSRTxgroupCP | .02 | .13 | 0.18 | .856 | [-0.23, 0.28] |  |
| SSRTxgroupSAD | .11 | .12 | 0.89 | .374 | [-0.13, 0.35] |  |
| SSRTxgroupCOM | -.02 | .12 | -0.18 | .854 | [-0.27, 0.22] |  |
|  |  |  |  |  |  | R² = .680***  CI [.572, .738] |

*Note.* For numerical predictors, β indicates the standardized regression weights. Reference group = AUD, SE = standard error, CI = confidence interval. Boldface – regressor of interest. *N* = 175.
* indicates *p* < .05. ** indicates *p* < .01. *** indicates *p* < .001

## 2.5 Control analysis: Group-specific association of inhibitory control-related network activation with social anxiety severity

No significant peaks for the main effect of social anxiety severity at *p*<.05 FWE-corrected in inhibition-related neural activation, neither within the default mode network nor the ventral attention network.

## 2.6 Control analysis: The Association ofDMN activation and AUD severity in COM is not explained by social anxiety severity

**Table S16**

*Activation peaks from the contrasts reflecting COM-specific AUD severity effects from the full factorial model regressing inhibition-related neuronal DMN activation on the interaction of group and AUD severity while controlling for social anxiety severity*

| **Small** | ***Group*** |  | | MNI | | | |  | | | |  | |
| --- | --- | --- | --- | --- | --- | --- | --- | --- | --- | --- | --- | --- | --- |
| **volume** | *direction of effect* |  | | coordinates | | | |  | | | |  | |
|  | brain region | H | x | | y | z |  | | CS | T | pFWE | |
| **DMN** | ***COM*** |  |  | |  |  |  | |  |  |  | |
|  | *less activation with more AUD severity* |  |  | |  |  |  | |  |  |  | |
|  | superior frontal gyrus (mPFC) | L | -15 | | 50 | 41 |  | | 74 | 4.31 | .019 | |
|  | superior frontal gyrus (mPFC) | L | -21 | | 56 | 32 |  | |  | 3.88 | .078 | |
|  | superior frontal gyrus (mPFC) | L | -12 | | 41 | 53 |  | |  | 3.79 | .103 | |
|  | superior frontal gyrus (mPFC) | L | -6 | | 47 | 32 |  | |  | 3.21 | .425 | |
|  |  |  |  | |  |  |  | |  |  |  | |
|  | *more activation with more AUD severity* |  |  | |  |  |  | |  |  |  | |
|  | no significant clusters |  |  | |  |  |  | |  |  |  | |

*Note*. MNI = Montreal Neurological Institute standard brain, H = hemisphere, Cs = cluster size in number of voxels. Link AUD severity = effect of AUD severity on the inhibition contrast (sStop>sGo) controlled for social anxiety severity, scanversion, age and sex. Reported peaks are labelled according to the closest anatomical region based on AAL. Superior medial prefrontal cortex, mPFC. N = 175, degrees of freedom model: 163.

# **Results with ROIs as preregistered**

## 3.1 Group comparisons

**Neural inhibitory control**

**Table S17**

*Descriptive statistics for rIFG, dACC, and preSMA as a function of group.*

|  | Neural inhibitory control | | | | | |
| --- | --- | --- | --- | --- | --- | --- |
|  | *rIFG* | | *dACC* | | *preSMA* | |
| group | *M* | *SD* | *M* | *SD* | *M* | *SD* |
| CP | 1.38 | 1.75 | 1.16 | 1.67 | 1.02 | 1.46 |
| SAD | 1.07 | 1.43 | 1.05 | 1.33 | 0.83 | 1.17 |
| AUD | 0.73 | 1.37 | 0.89 | 1.27 | 0.65 | 1.23 |
| COM | 0.89 | 1.31 | 0.73 | 1.14 | 0.64 | 1.15 |

*Note.* *M* and *SD* represent mean and standard deviation, respectively.

**Right inferior frontal gyrus ROI**

**Table S18**

*Fixed-Effects ANCOVA results using mean activation in the rIFG ROI during sStop > sGo as the criterion*

| Predictor | Sum  of  Squares | *df* | Mean  Square | *F* | *p* | partial η2 | partial η2  90% CI  [LL, UL] |
| --- | --- | --- | --- | --- | --- | --- | --- |
| (Intercept) | 13.03 | 1 | 13.03 | 5.98 | .015 |  |  |
| scanv | 0.63 | 1 | 0.63 | 0.29 | .592 | .00 | [.00, .03] |
| femalesex | 3.48 | 1 | 3.48 | 1.60 | .208 | .01 | [.00, .05] |
| age | 0.08 | 1 | 0.08 | 0.04 | .849 | .00 | [.00, .01] |
| group | 10.72 | 3 | 3.57 | 1.64 | .182 | .03 | [.00, .07] |
| Error | 366.04 | 168 | 2.18 |  |  |  |  |

*Note.* LL and UL represent the lower-limit and upper-limit of the partial η2 confidence interval, respectively. scanv = unique variance in scanversion (pre-/post scanner upgrade) adjusted for alcohol-related problems [AUD severity].

**Table S19**

*Post hoc hypothesis testing for preregistered comparisons using mean activation in the rIFG ROI during sStop > sGo as the criterion*

| Group (I) | Group (J) | *Mean difference (I-J)* | Std. Error | 95% CI  [LL, UL] | *t* | *pone-sided* | *pBonferroni-Holm* |
| --- | --- | --- | --- | --- | --- | --- | --- |
| CP | AUD | 0.68 | 0.33 | [-0.17, 1.53] | 2.07 | .020 | .060 |
|  | COM | 0.52 | 0.33 | [-0.32, 1.36] | 1.60 | .056 | .167 |

Mean difference: Difference in estimated marginal means controlled for scanversion and sex. 95%-CI: 95% Confidence Interval for the Mean Difference. Bonferroni-Holm correction for number of ROIs.

**Figure S2**

*Group differences in estimated marginal means from ANCOVA using mean activation in the rIFG ROI during sStop > sGo as the criterion*


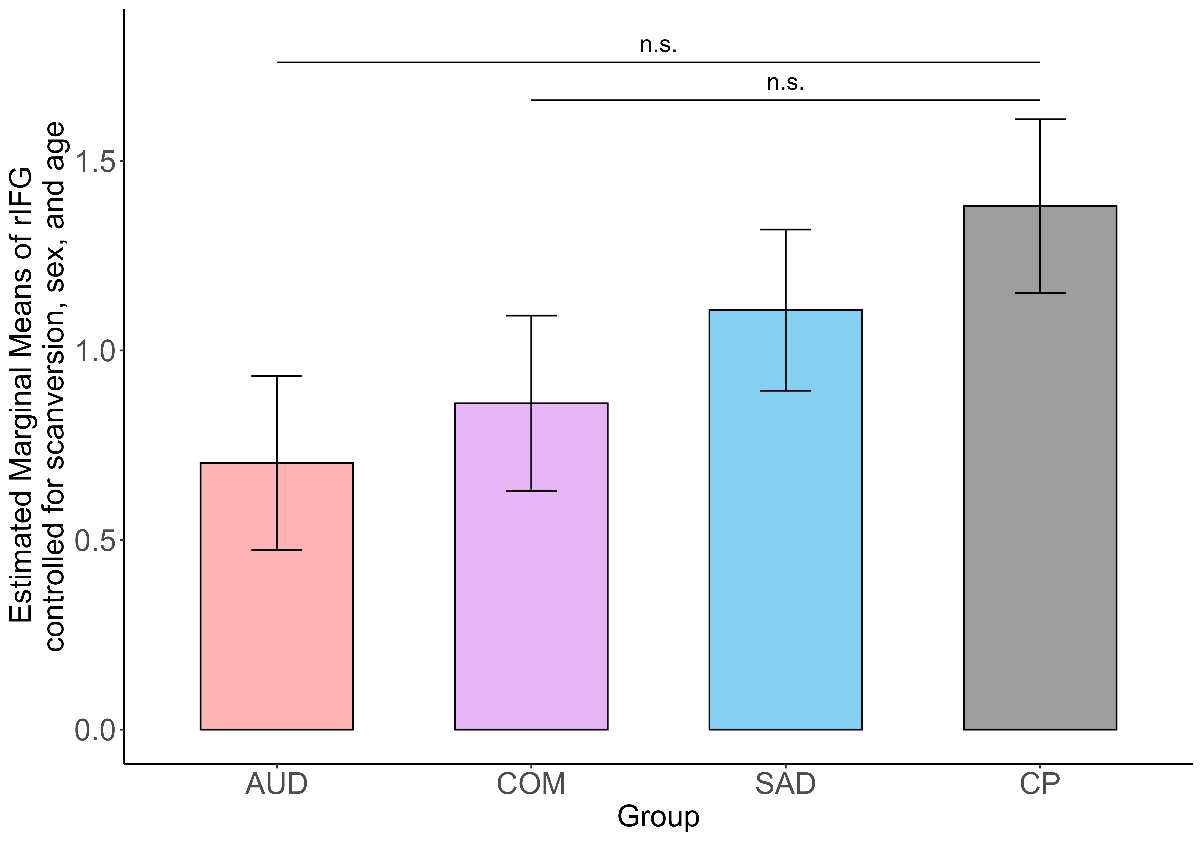


*Note.** significant mean difference in post-hoc test with directed hypothesis (AUD/COM weaker neural activation than CP) after Bonferroni-Holm correction for number of ROIs. n.s. not significant.

**Dorsal anterior cingulate ROI**

**Table S20**

*Fixed-Effects ANCOVA results using mean activation in the dACC ROI during sStop > sGo as the criterion*

| Predictor | Sum  of  Squares | *df* | Mean  Square | *F* | *p* | partial η2 | partial η2  90% CI  [LL, UL] |
| --- | --- | --- | --- | --- | --- | --- | --- |
| (Intercept) | 22.67 | 1 | 22.67 | 12.09 | .001 |  |  |
| scanv | 0.05 | 1 | 0.05 | 0.03 | .872 | .00 | [.00, .01] |
| femalesex | 0.73 | 1 | 0.73 | 0.39 | .533 | .00 | [.00, .03] |
| age | 3.56 | 1 | 3.56 | 1.90 | .170 | .01 | [.00, .05] |
| Group | 4.13 | 3 | 1.38 | 0.73 | .533 | .01 | [.00, .04] |
| Error | 314.99 | 168 | 1.87 |  |  |  |  |

*Note.* LL and UL represent the lower-limit and upper-limit of the partial η2 confidence interval, respectively. scanv = unique variance in scanversion (pre-/post scanner upgrade) adjusted for alcohol-related problems [AUD severity].

**Table S21**

*Post hoc hypothesis testing for preregistered comparisons using mean activation in the dACC ROI during sStop > sGo as the criterion*

| Group (I) | Group (J) | *Mean difference (I-J)* | Std. Error | 95% CI  [LL, UL] | *t* | *pone-sided* | *pBonferroni-Holm* |
| --- | --- | --- | --- | --- | --- | --- | --- |
| CP | AUD | 0.24 | 0.30 | [-0.55, 1.03] | 0.79 | .216 | .216 |
|  | COM | 0.42 | 0.30 | [-0.36, 1.20] | 1.40 | .082 | .167 |

Mean difference: Difference in estimated marginal means controlled for scanversion and sex. 95%-CI: 95% Confidence Interval for the Mean Difference. Bonferroni-Holm correction for number of ROIs.

**Figure S3**

*Group differences in estimated marginal means from ANCOVA using mean activation in the dACC ROI during sStop > sGo as the criterion*


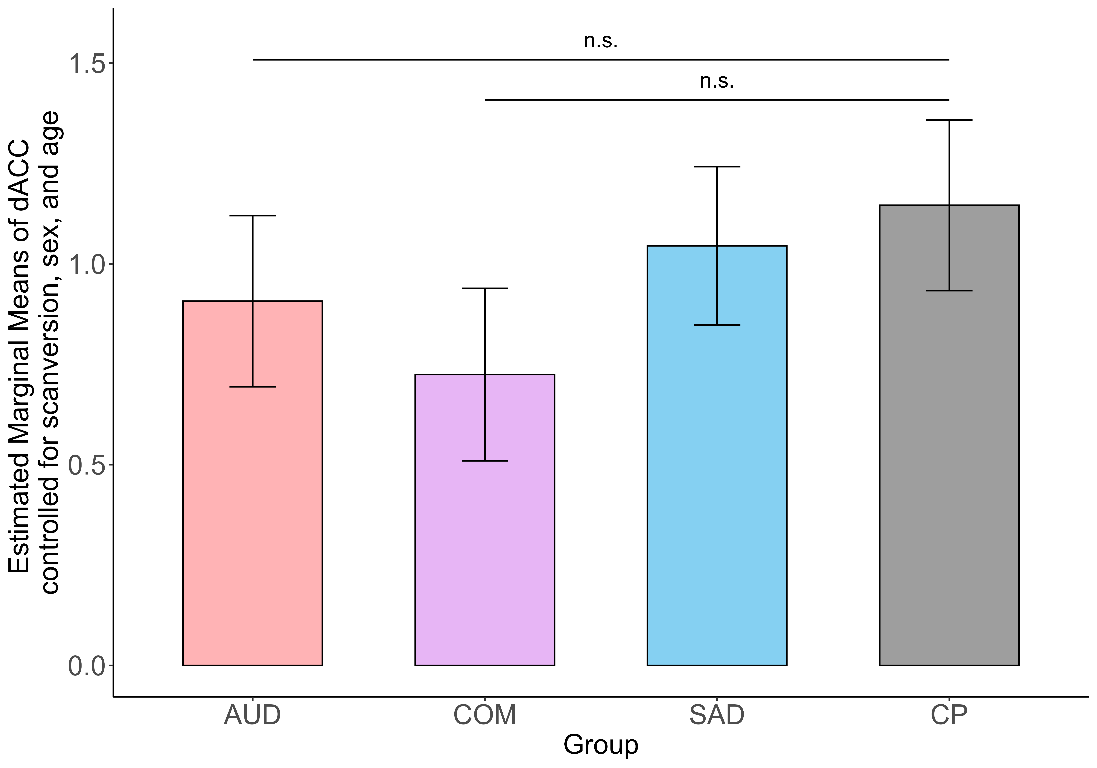


*Note.* * significant mean difference in post-hoc test with directed hypothesis (AUD/COM weaker neural activation than CP) after Bonferroni-Holm correction for number of ROIs. n.s. not significant.

**Presupplementary motor area ROI**

**Table S22**

*Fixed-Effects ANCOVA results using mean activation in the preSMA ROI during sStop > sGo as the criterion*

| Predictor | Sum  of  Squares | *df* | Mean  Square | *F* | *p* | partial η2 | partial η2  90% CI  [LL, UL] |
| --- | --- | --- | --- | --- | --- | --- | --- |
| (Intercept) | 4.79 | 1 | 4.79 | 3.01 | .084 |  |  |
| scanv | 0.01 | 1 | 0.01 | 0.00 | .954 | .00 | [.00, 1.00] |
| femalesex | 1.34 | 1 | 1.34 | 0.84 | .360 | .00 | [.00, .04] |
| age | 0.56 | 1 | 0.56 | 0.35 | .555 | .00 | [.00, .03] |
| group | 5.15 | 3 | 1.72 | 1.08 | .359 | .02 | [.00, .05] |
| Error | 267.13 | 168 | 1.59 |  |  |  |  |

*Note.* LL and UL represent the lower-limit and upper-limit of the partial η2 confidence interval, respectively. scanv = unique variance in scanversion (pre-/post scanner upgrade) adjusted for alcohol-related problems [AUD severity].

**Table S23**

*Post hoc hypothesis testing for preregistered comparisons using mean activation in the preSMA ROI during sStop > sGo as the criterion*

| Group (I) | Group (J) | *Mean difference (I-J)* | Std. Error | 95% CI  [LL, UL] | *t* | *pone-sided* | *pBonferroni-Holm* |
| --- | --- | --- | --- | --- | --- | --- | --- |
| CP | AUD | 0.43 | 0.28 | [-0.30, 1.15] | 1.53 | .064 | .128 |
|  | COM | 0.45 | 0.28 | [-0.31, 1.14] | 1.50 | .068 | .167 |

Mean difference: Difference in estimated marginal means controlled for scanversion and sex. 95%-CI: 95% Confidence Interval for the Mean Difference. Bonferroni-Holm correction for number of ROIs.

**Figure S4**

*Group differences in estimated marginal means from ANCOVA using mean activation in the preSMA ROI during sStop > sGo as the criterion*


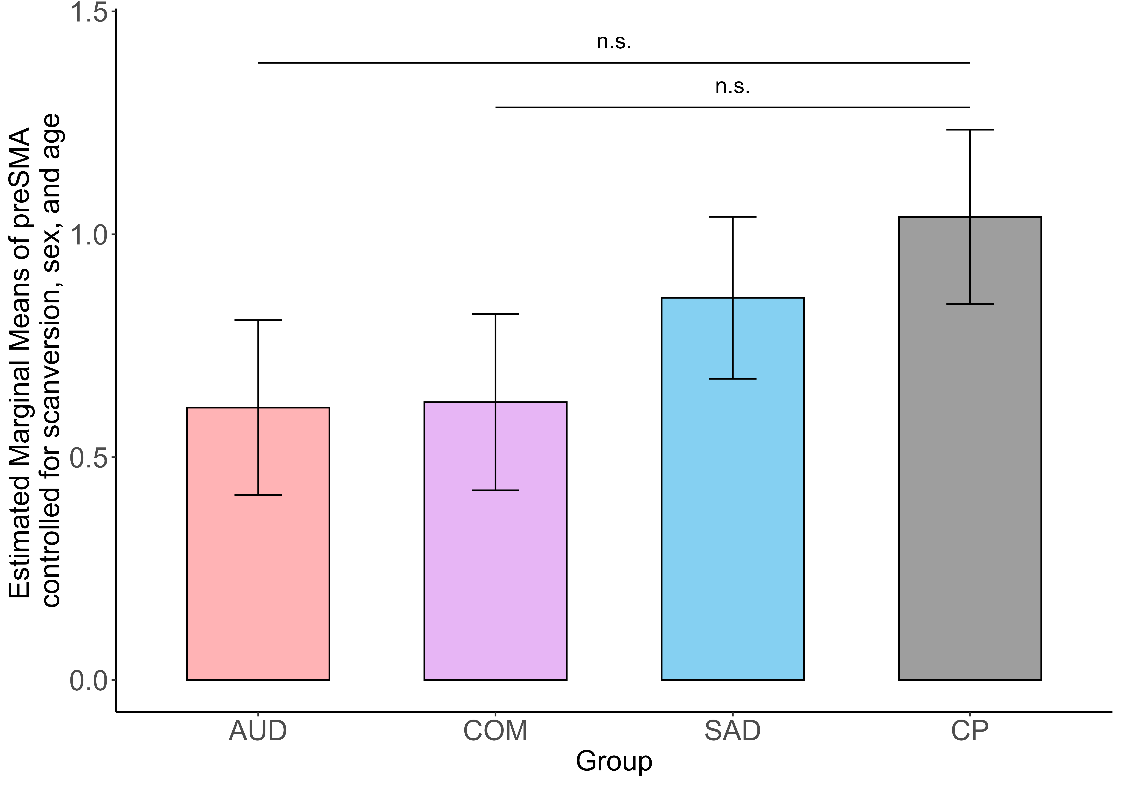


*Note.** significant mean difference in post-hoc test with directed hypothesis (AUD/COM weaker neural activation than CP) after Bonferroni-Holm correction for number of ROIs. n.s. not significant.

## 3.2 Group-specific associations between ROI activation and AUD severity in AUD and COM

**rIFG ROI**

**Table S24**

*Regression results using* **AUD severity** *as the criterion*

| Term | β | *SE* | *t* | *p* | 95% CI | Modelfit |
| --- | --- | --- | --- | --- | --- | --- |
| (Intercept) | .87 | .10 | 8.93 | < .001*** | [0.68, 1.06] |  |
| rIFG | -.27 | .10 | -2.83 | .005** | [-0.46, -0.08] |  |
| groupCOM | -.01 | .13 | -0.04 | .965 | [-0.26, 0.25] |  |
| groupSAD | -1.58 | .12 | -12.83 | < .001*** | [-1.83, -1.34] |  |
| groupCP | -1.65 | .13 | -12.76 | < .001*** | [-1.91, -1.40] |  |
| scanversion | .05 | .05 | 1.12 | .266 | [-0.04, 0.14] |  |
| femalesex | -.07 | .09 | -0.75 | .454 | [-0.25, 0.11] |  |
| age | -.11 | .05 | -2.33 | .021* | [-0.20, -0.02] |  |
| **rIFGxgroupCOM** | .34 | .14 | 2.47 | .015* | [0.07, 0.62] |  |
| rIFGxgroupSAD | .17 | .13 | 1.31 | .191 | [-0.09, 0.42] |  |
| rIFGxgroupCP | .21 | .12 | 1.74 | .083 | [-0.03, 0.45] |  |
|  |  |  |  |  |  | R² = .693***  CI[.586, .749] |

*Note.* For numerical predictors, β indicates the standardized regression weights. Reference group = AUD, SE = standard error, CI = confidence interval. Boldface – regressor of interest. *N* = 175.
* indicates *p* < .05. ** indicates *p* < .01. *** indicates *p* < .001

**Table S25**
*Simple slope analysis of* ***rIFG activation predicting AUD severity*** *across the groups*

| Group | β | *SE* | *t* | *p* | 95% CI |
| --- | --- | --- | --- | --- | --- |
| **AUD** | -.27 | .10 | -2.83 | .005 | [-.46; -.08] |
| COM | .07 | .10 | 0.73 | .468 | [-.13; .28] |
| SAD | -.10 | .09 | -1.17 | .243 | [-.27; .07] |
| CP | -.06 | .08 | -0.77 | .442 | [-.21; .09] |

*Note.* For numerical predictors, β indicates the standardized regression weights. SE = standard error, CI = confidence interval. Boldface – regressor of interest. *N* = 175.
* indicates *p* < .05. ** indicates *p* < .01. *** indicates *p* < .001

**dACC ROI**

**Table S26**

*Regression results using* **AUD severity** *as the criterion*

| Term | β | *SE* | *t* | *p* | 95% CI | Modelfit |
| --- | --- | --- | --- | --- | --- | --- |
| (Intercept) | .90 | .10 | 9.49 | < .001*** | [0.72, 1.09] |  |
| dACC | -.31 | .09 | -3.24 | .001** | [-0.49, -0.12] |  |
| groupCOM | -.04 | .13 | -0.32 | .749 | [-0.29, 0.21] |  |
| groupSAD | -1.63 | .12 | -13.46 | < .001*** | [-1.87, -1.40] |  |
| groupCP | -1.7 | .13 | -13.45 | < .001*** | [-1.95, -1.45] |  |
| scanversion | .05 | .04 | 1.11 | .268 | [-0.04, 0.14] |  |
| femalesex | -.06 | .09 | -0.63 | .532 | [-0.23, 0.12] |  |
| age | -.12 | .05 | -2.66 | .009** | [-0.21, -0.03] |  |
| **dACCxgroupCOM** | .37 | .14 | 2.59 | .010* | [0.09, 0.66] |  |
| **dACCxgroupSAD** | .34 | .13 | 2.70 | .008** | [0.09, 0.59] |  |
| dACCxgroupCP | .22 | .12 | 1.87 | .063 | [-0.01, 0.46] |  |
|  |  |  |  |  |  | R² = .697***  CI[.590, .751] |

*Note.* For numerical predictors, β indicates the standardized regression weights. Reference group = AUD, SE = standard error, CI = confidence interval. Boldface – regressor of interest. *N* = 175.
* indicates *p* < .05. ** indicates *p* < .01. *** indicates *p* < .001

**Table S27**
*Simple slope analysis of* ***dACC activation predicting AUD severity*** *across the groups*

| Group | β | *SE* | *t* | *p* | 95% CI |
| --- | --- | --- | --- | --- | --- |
| **AUD** | -.31 | .10 | -3.24 | .001 | [-.49; -.12] |
| COM | .07 | .11 | 0.61 | .542 | [-.15; .28] |
| SAD | .03 | .08 | 0.40 | .689 | [-.13; .20] |
| CP | -.08 | .07 | -1.15 | .251 | [-.23; .06] |

*Note.* For numerical predictors, β indicates the standardized regression weights. SE = standard error, CI = confidence interval. Boldface – regressor of interest. *N* = 175.
* indicates *p* < .05. ** indicates *p* < .01. *** indicates *p* < .001

**preSMA ROI**

**Table S27**

*Regression results using* **AUD severity** *as the criterion*

| Term | β | *SE* | *t* | *p* | 95% CI | Modelfit |
| --- | --- | --- | --- | --- | --- | --- |
| (Intercept) | .90 | .10 | 9.13 | < .001*** | [0.70, 1.09] |  |
| preSMA | -.14 | .09 | -1.58 | .117 | [-0.33, 0.04] |  |
| groupCOM | -.05 | .13 | -0.35 | .725 | [-0.30, 0.21] |  |
| groupSAD | -1.63 | .13 | -12.97 | < .001*** | [-1.87, -1.38] |  |
| groupCP | -1.7 | .13 | -12.96 | < .001*** | [-1.96, -1.44] |  |
| scanversion | .05 | .05 | 1.02 | .310 | [-0.04, 0.14] |  |
| femalesex | -.05 | .09 | -0.60 | .551 | [-0.24, 0.13] |  |
| age | -.10 | .05 | -2.07 | .040* | [-0.20, -0.00] |  |
| preSMAxgroupCOM | .15 | .14 | 1.08 | .280 | [-0.12, 0.42] |  |
| preSMAxgroupSAD | .18 | .13 | 1.36 | .174 | [-0.08, 0.43] |  |
| preSMAxgroupCP | .12 | .12 | 0.96 | .338 | [-0.12, 0.36] |  |
|  |  |  |  |  |  | R² = .679***  CI[.568, .736] |

*Note.* For numerical predictors, β indicates the standardized regression weights. Reference group = AUD, SE = standard error, CI = confidence interval. Boldface – regressor of interest. *N* = 175.
* indicates *p* < .05. ** indicates *p* < .01. *** indicates *p* < .001.

**Figure S5**

*Group-specific dimensional association between neural activation during inhibition and AUD severity*


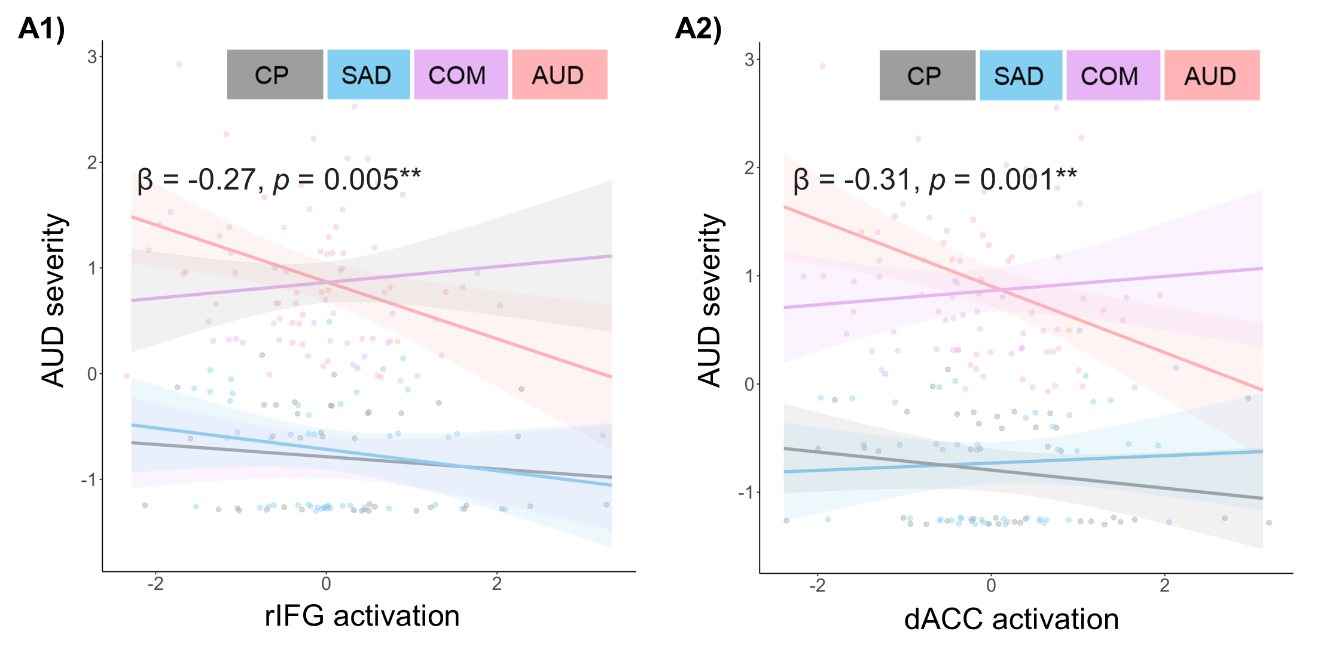


*Note.* Scatter plots show the slopes of regional neural activation in the right inferior frontal gyrurs, rIFG (A1), and dorsal anterior cingulate cortex, dACC (A2) during inhibition extracted from the successful Stop > successful Go contrast (sStop > sGo) on AUD severity per group (standardized estimated values from a simple slope analysis controlling for sex, age, and scanversion) based on a significant interaction effect with group in the rIFG, and dACC in AUD. AUD = alcohol use disorder, SAD = social anxiety disorder, CP = control participants, COM = comorbid group with AUD and SAD.

# **References**

1. Clark DM, Wells A. A cognitive model of social phobia. In: Heimberg RG, Liebowitz MR, Hope DA, Schneier FR, editors. Social phobia: diagnosis, assessment and treatment. New York: The Guilford Press; 1995. p. 69-93.

2. Leber S, Heidenreich T, Stangier U, Hofmann SG. Processing of facial affect under social threat in socially anxious adults: mood matters. Depression and Anxiety. 2009;26(2):196-206.

3. Duval ER, Javanbakht A, Liberzon I. Neural circuits in anxiety and stress disorders: a focused review. Therapeutics and Clinical Risk Management. 2015;11:115-26.

4. Maresh EL, Allen JP, Coan JA. Increased default mode network activity in socially anxious individuals during reward processing. Biology of Mood & Anxiety Disorders. 2014;4(1):7.

5. Buckner JD, Schmidt NB, Lang AR, Small JW, Schlauch RC, Lewinsohn PM. Specificity of social anxiety disorder as a risk factor for alcohol and cannabis dependence. Journal of Psychiatric Research. 2008;42(3):230-9.

6. De Lijster JM, Dierckx B, Utens EM, Verhulst FC, Zieldorff C, Dieleman GC, et al. The age of onset of anxiety disorders: a meta-analysis. Canadian journal of psychiatry Revue canadienne de psychiatrie. 2016;62(4):237.

7. Schneier FR, Foose TE, Hasin DS, Heimberg RG, Liu SM, Grant BF, et al. Social anxiety disorder and alcohol use disorder co-morbidity in the National Epidemiologic Survey on Alcohol and Related Conditions. Psychological Medicine. 2010;40(6):977-88.

8. Grant BF, Goldstein RB, Saha TD, Chou SP, Jung J, Zhang H, et al. Epidemiology of DSM-5 Alcohol Use Disorder: Results From the National Epidemiologic Survey on Alcohol and Related Conditions III. JAMA Psychiatry. 2015;72(8):757-66.

9. Bacon AK, Ham LS. Attention to social threat as a vulnerability to the development of comorbid social anxiety disorder and alcohol use disorders: An Avoidance-Coping Cognitive Model. Addictive Behaviors. 2010;35(11):925-39.

10. Salemink E, van Lier PAC, Meeus W, Raaijmakers SF, Wiers RW. Implicit alcohol–relaxation associations in frequently drinking adolescents with high levels of neuroticism. Addictive Behaviors. 2015;45:8-13.

11. Bulley A, Miloyan B, Brilot B, Gullo MJ, Suddendorf T. An evolutionary perspective on the co-occurrence of social anxiety disorder and alcohol use disorder. Journal of Affective Disorders. 2016;196:62-70.

12. Butler TR, Karkhanis AN, Jones SR, Weiner JL. Adolescent Social Isolation as a Model of Heightened Vulnerability to Comorbid Alcoholism and Anxiety Disorders. Alcoholism: Clinical and Experimental Research. 2016;40(6):1202-14.

13. Heimberg RG, Horner KJ, Juster HR, Safren SA, Brown EJ, Schneier FR, et al. Psychometric properties of the Liebowitz Social Anxiety Scale. Psychological Medicine. 1999;29(1):199-212.

14. Stangier U, Heidenreich T. Liebowitz social anxiety scale. Internationale Skalen Für Psychiatrie (International Scales for Psychiatry). 2005.

15. Babor TF, Higgins-Biddle JC, Saunders JB, Monteiro MG. The Alcohol Use Identification Test. Guidelines for Use in Primary Care World Health Organization. 2001.

16. Moffat AC, Osselton MD, Widdop B, Watts J. Clarke's analysis of drugs and poisons in pharmaceuticals, body fluids and postmortem material London Pharmaceutical Press; 2011.

17. Faul F, Erdfelder E, Lang A-G, Buchner A. G*Power 3: A flexible statistical power analysis program for the social, behavioral, and biomedical sciences. Behavior Research Methods. 2007;39(2):175-91.

18. Cavanagh JF, Shackman AJ. Frontal midline theta reflects anxiety and cognitive control: Meta-analytic evidence. Journal of Physiology-Paris. 2015;109(1):3-15.

19. Pasion R, Barbosa F. ERN as a transdiagnostic marker of the internalizing-externalizing spectrum: A dissociable meta-analytic effect. Neuroscience & Biobehavioral Reviews. 2019;103:133-49.

20. Gorka SM, Lieberman L, Kreutzer KA, Carrillo V, Weinberg A, Shankman SA. Error-related neural activity and alcohol use disorder: Differences from risk to remission. Progress in Neuro-Psychopharmacology and Biological Psychiatry. 2019;92:271-8.

21. Gorka SM, Shankman SA. Preliminary evidence that reactivity to uncertain threat is an endophenotype for alcohol use disorder. Drug and Alcohol Dependence. 2017;180:265-71.

22. MacKillop J, Amlung MT, Few LR, Ray LA, Sweet LH, Munafò MR. Delayed reward discounting and addictive behavior: a meta-analysis. Psychopharmacology. 2011;216(3):305-21.

23. Zilverstand A, Huang AS, Alia-Klein N, Goldstein RZ. Neuroimaging Impaired Response Inhibition and Salience Attribution in Human Drug Addiction: A Systematic Review. Neuron. 2018;98(5):886-903.

24. Aron AR, Poldrack RA. Cortical and Subcortical Contributions to Stop Signal Response Inhibition: Role of the Subthalamic Nucleus. The Journal of Neuroscience. 2006;26(9):2424.

25. Beesdo-Baum K, Zaudig M, Wittchen H-U. SCID-5-CV: Strukturiertes klinisches Interview für DSM-5-Störungen-Klinische Version: deutsche Bearbeitung des Structured Clinical Interview for DSM-5 Disorders-Clinician version von Michael B. First, Janet BW Williams, Rhonda S. Karg, Robert L. Spitzer: Hogrefe; 2019.

26. First MJAPAP. User’s guide for the SCID-5-CV Structured Clinical Interview for DSM-5Ⓡ disorders: Clinical version. 2016.

27. Hildebrandt MK, Schwarz K, Dieterich R, Endrass T. Dissociating the Link of Neural Correlates of Inhibition to the Degree of Substance Use and Substance-Related Problems: A Preregistered, Multimodal, Combined Cross-sectional and Longitudinal Study. Biological Psychiatry. 2023;94(11):898-905.

28. Sobell LC, Sobell MB. Timeline Follow-Back. In: Litten RZ, Allen JP, editors. Measuring Alcohol Consumption: Psychosocial and Biochemical Methods. Totowa, NJ: Humana Press; 1992. p. 41-72.

29. Kuitunen-Paul S, Rehm J, Lachenmeier DW, Kadrić F, Kuitunen PT, Wittchen H-U, et al. Assessment of alcoholic standard drinks using the Munich composite international diagnostic interview (M-CIDI): An evaluation and subsequent revision. International Journal of Methods in Psychiatric Research. 2017;26(3):e1563.

30. Verbruggen F, Aron AR, Band GPH, Beste C, Bissett PG, Brockett AT, et al. A consensus guide to capturing the ability to inhibit actions and impulsive behaviors in the stop-signal task. eLife. 2019;8:e46323.

31. Cooper ML. Motivations for alcohol use among adolescents: Development and validation of a four-factor model. Psychological assessment. 1994;6(2):117-28.

32. Kuntsche E, Knibbe R, Gmel G, Engels R. Replication and Validation of the Drinking Motive Questionnaire Revised (DMQ-R, Cooper, 1994) among Adolescents in Switzerland. European Addiction Research. 2006;12(3):161-8.

33. Siegel JS, Power JD, Dubis JW, Vogel AC, Church JA, Schlaggar BL, et al. Statistical improvements in functional magnetic resonance imaging analyses produced by censoring high-motion data points. Human Brain Mapping. 2014;35(5):1981-96.

34. Zhang R, Geng X, Lee TMC. Large-scale functional neural network correlates of response inhibition: an fMRI meta-analysis. Brain Structure and Function. 2017;222(9):3973-90.

35. Diesburg DA, Wessel JR. The Pause-then-Cancel model of human action-stopping: Theoretical considerations and empirical evidence. Neuroscience & Biobehavioral Reviews. 2021;129:17-34.

36. Long J, Song X, Wang Y, Wang C, Huang R, Zhang R. Distinct neural activation patterns of age in subcomponents of inhibitory control: A fMRI meta-analysis. Frontiers in Aging Neuroscience. 2022;Volume 14 - 2022.

37. Le TM, Potvin S, Zhornitsky S, Li C-SR. Distinct patterns of prefrontal cortical disengagement during inhibitory control in addiction: A meta-analysis based on population characteristics. Neuroscience & Biobehavioral Reviews. 2021;127:255-69.

38. Sjoerds Z, van den Brink W, Beekman ATF, Penninx BWJH, Veltman DJ. Response inhibition in alcohol-dependent patients and patients with depression/anxiety: a functional magnetic resonance imaging study. Psychological Medicine. 2014;44(8):1713-25.

39. Wang Y, Isoda M, Matsuzaka Y, Shima K, Tanji J. Prefrontal cortical cells projecting to the supplementary eye field and presupplementary motor area in the monkey. Neuroscience Research. 2005;53(1):1-7.

40. Duann J-R, Ide JS, Luo X, Li C-sR. Functional Connectivity Delineates Distinct Roles of the Inferior Frontal Cortex and Presupplementary Motor Area in Stop Signal Inhibition. The Journal of Neuroscience. 2009;29(32):10171.

41. Rolls ET, Huang C-C, Lin C-P, Feng J, Joliot M. Automated anatomical labelling atlas 3. NeuroImage. 2020;206:116189.

42. Urchs S, Armoza J, Moreau C, Benhajali Y, St-Aubin J, Orban P, et al. MIST: a multi-resolution parcellation of functional brain networks [version 2; peer review: 4 approved]. 2019;1(3):10.12688.
